# Supplementary material for: Quantitative Assessment of the Effect of Agency-Led Prescribed Burns and Cultural Burns on Soil Properties in Southeastern Australia
Source: MDPI journal article supplement (doi:10.3390/fire7030075), 2024-02-29
Supplement: s1 [file s1]

## Supplementary Materials

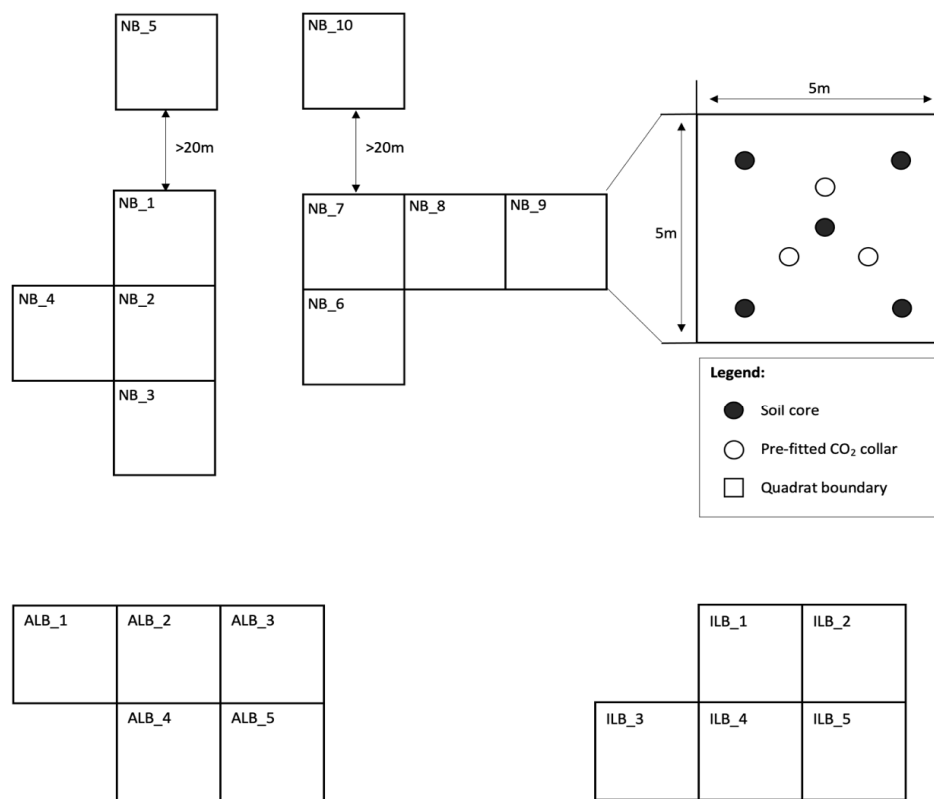

**Supplementary Figure S1.** Quadrat design for each site: control–no burn (NB), agency-led burn (ALB), and Indigenous-led burn (ILB). In the top right, the sizing of each quadrat and approximate locations of where the soil cores were taken and CO<sub>2</sub> chambers were fitted are displayed.

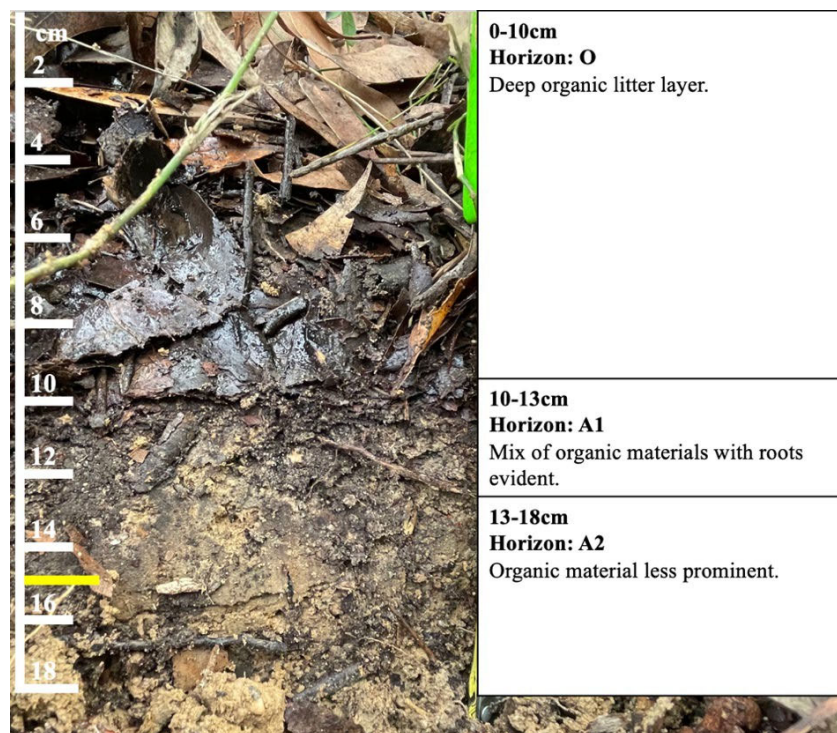

**Supplementary Figure S2.** Soil profile at the control/no burn site. Yellow marker on the scale indicates the depth of the soil core taken for sampling.

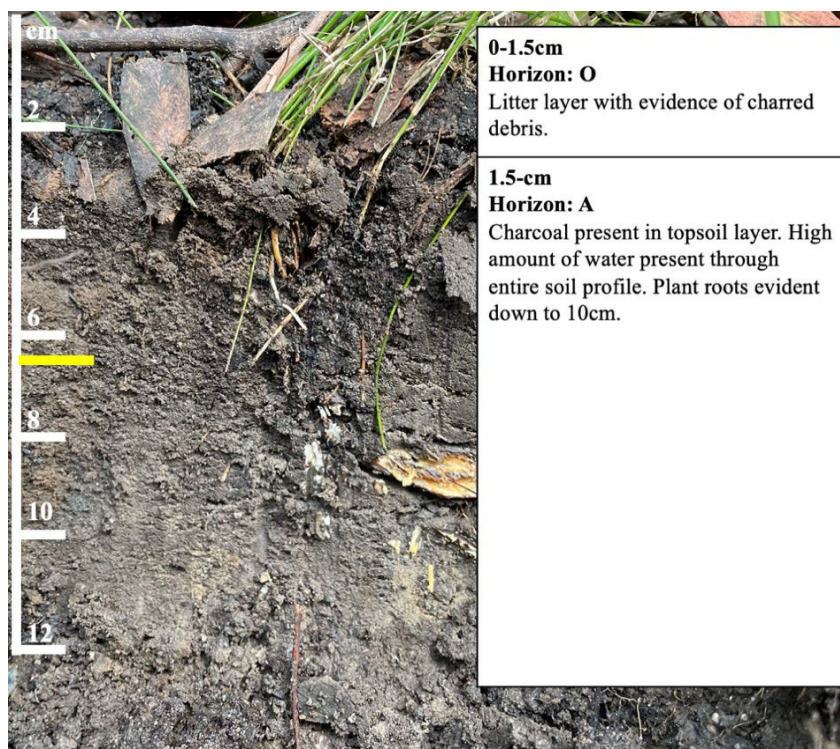

**Supplementary Figure S3.** Soil profile of the Indigenous-led burn (ILB) site. Yellow marker on the scale indicates the depth of each soil core taken for sampling.

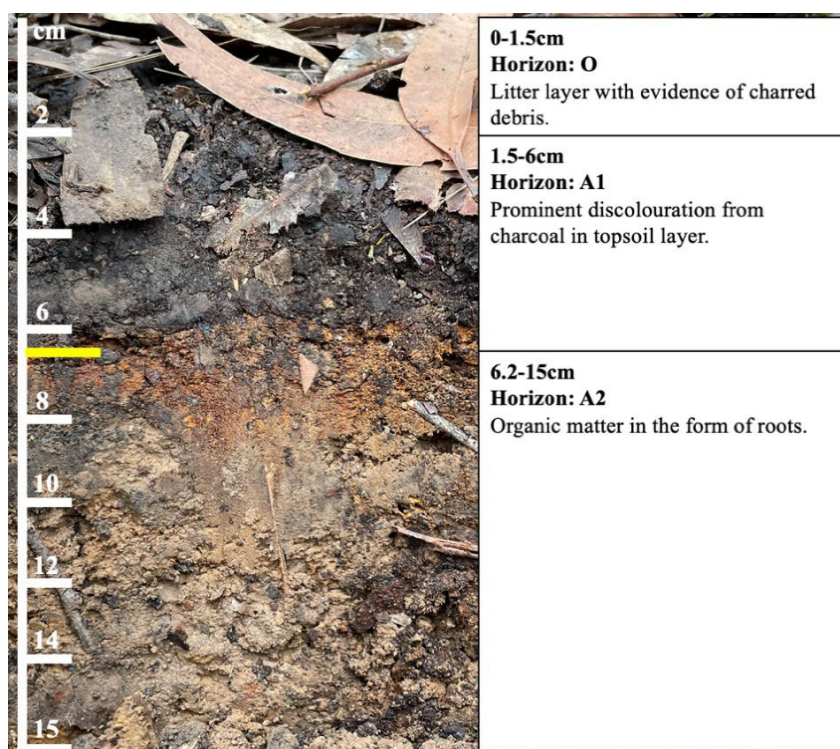

**Supplementary Figure S4.** Soil profile of the Agency-led burn (ALB) site. Yellow marker on the scale indicates the depth of each soil core taken.
